# Supplementary material for: Clinical Value of EGFR Copy Number Gain Determined by Amplicon-Based Targeted Next Generation Sequencing in Patients with EGFR-Mutated NSCLC
Source: Springer Nature journal article supplement (doi:10.1007/s11523-021-00798-2), 2021-02-19
Supplement: MOESM1 [file 18881868]

**Clinical value of *EGFR* copy number gain determined by amplicon-based targeted next generation sequencing in *EGFR* mutated NSCLC patients**

Jiacong Wei<sup>1,4,+</sup>, Pei Meng<sup>2,5,+</sup>, Miente Martijn Terpstra<sup>1</sup>, Anke van Rijk<sup>2</sup>, Menno Tamminga<sup>3</sup>, Frank Scherpen<sup>2</sup>, Arja ter Elst<sup>2</sup>, Mohamed Z. Alimohamed<sup>1,9</sup>, Lennart F. Johansson<sup>1</sup>, Jos Stigt<sup>6</sup>, Rolof P.G. Gijtenbeek<sup>7</sup>, John van Putten<sup>8</sup>, T. Jeroen N. Hiltermann<sup>3</sup>, Harry J.M. Groen<sup>3</sup>, Klaas Kok<sup>1</sup>, Anthonie J. van der Wekken<sup>3</sup>, Anke van den Berg<sup>2\*</sup>

<sup>1</sup>Department of Genetics, University of Groningen, University Medical Center Groningen, Netherlands

<sup>2</sup>Department of Pathology and Medical Biology, University of Groningen, University Medical Center Groningen, Netherlands

<sup>3</sup>Department of Pulmonary Diseases, University of Groningen, University Medical Center Groningen, Netherlands

<sup>4</sup>Department of Pathology, Cancer Hospital Chinese Academy of Medical Sciences, Beijing, China

<sup>5</sup>Department of Pathology, Collaborative and Creative Centre, Shantou University Medical College, Shantou, Guangdong, China

<sup>6</sup>Department of Pulmonary Diseases, Isala Clinic, Zwolle, Netherlands

<sup>7</sup>Department of Pulmonary Diseases, Medical Center Leeuwarden, Leeuwarden, Netherlands

<sup>8</sup>Department of Pulmonary Diseases, Martini Hospital, Groningen, Netherlands

<sup>9</sup>Department of Haematology and Blood Transfusion, Muhimbili University of Health and Allied Sciences, Dar-es-Salaam, Tanzania

<sup>+</sup>Authors contributed equally

<sup>\*</sup>Corresponding author

Address for correspondence:

Anke van den Berg

Department of Pathology & Medical Biology, HPC: EA10, Room F0-15

University Medical Center Groningen

Hanzeplein 1

9713 GZ Groningen

Phone: +31-50-3611476

Email: a.van.den.berg01@umcg.nl

**The authors declare no potential conflicts of interest.**

Supplementary Data

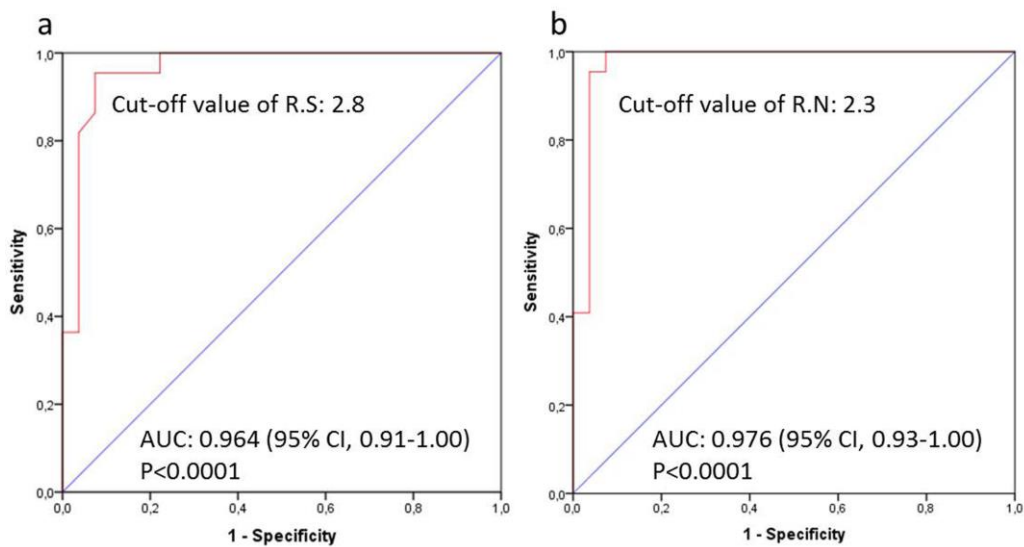

**Supplementary Figure S1.** ROC curve analysis to determine EGFR ratio cut-off by **a)** internal comparison approach and **b)** normal comparison approach.

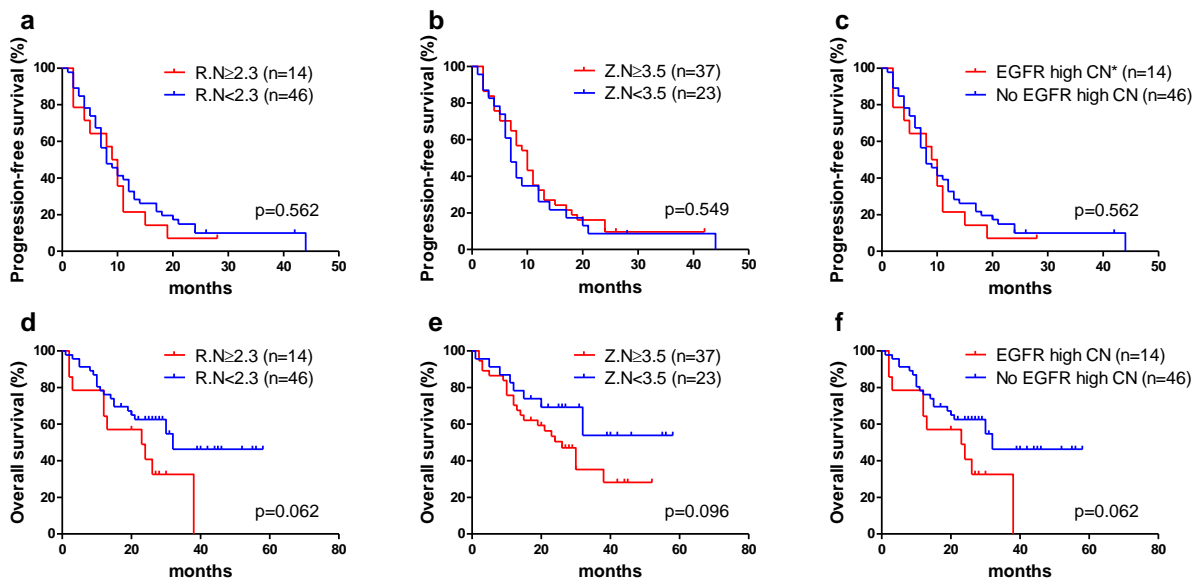

**Supplementary Figure S2.** Kaplan Meier plots of progression free and overall survival for ratio, z score and the combined score (indicated as *EGFR* high CN or no *EGFR* high CN) of *EGFR* gain using the compared with normal samples approach. **a, b, c)** Progression-free survival time of *EGFR* mutated patients based on ratio  $\geq$  2.3, z score  $\geq$  3.5 and the combined criteria. **d, e, f)** Overall survival of *EGFR* mutated patients based on *EGFR* ratio  $\geq$  2.3, z score  $\geq$  3.5, and the combined criteria. No significant differences were observed. \*CN: copy number

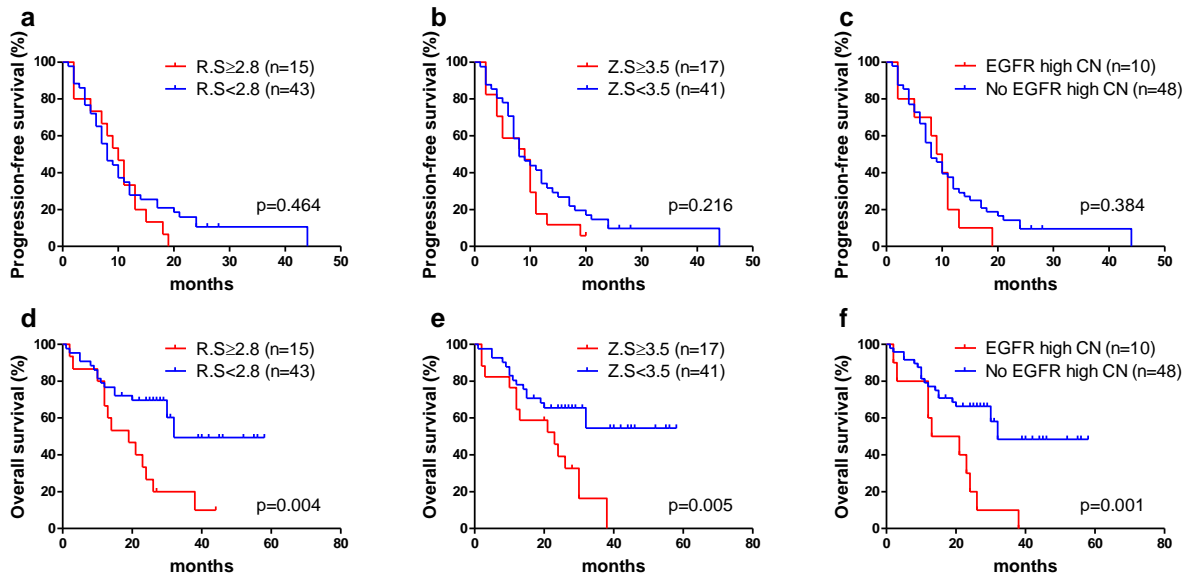

**Supplementary Figure S3.** Kaplan Meier plots of progression free and overall survival in 58 patients excluded two patients received osimertinib as first-line treatment using the internal comparison approach. **a, b, c)** Progression-free survival time of EGFR mutated patients based on ratio  $\geq 2.8$ , z score  $\geq 3.5$  and the combined criteria. **d, e, f)** Overall survival of EGFR mutated patients based on EGFR ratio  $\geq 2.8$ , z score  $\geq 3.5$ , and the combined criteria.

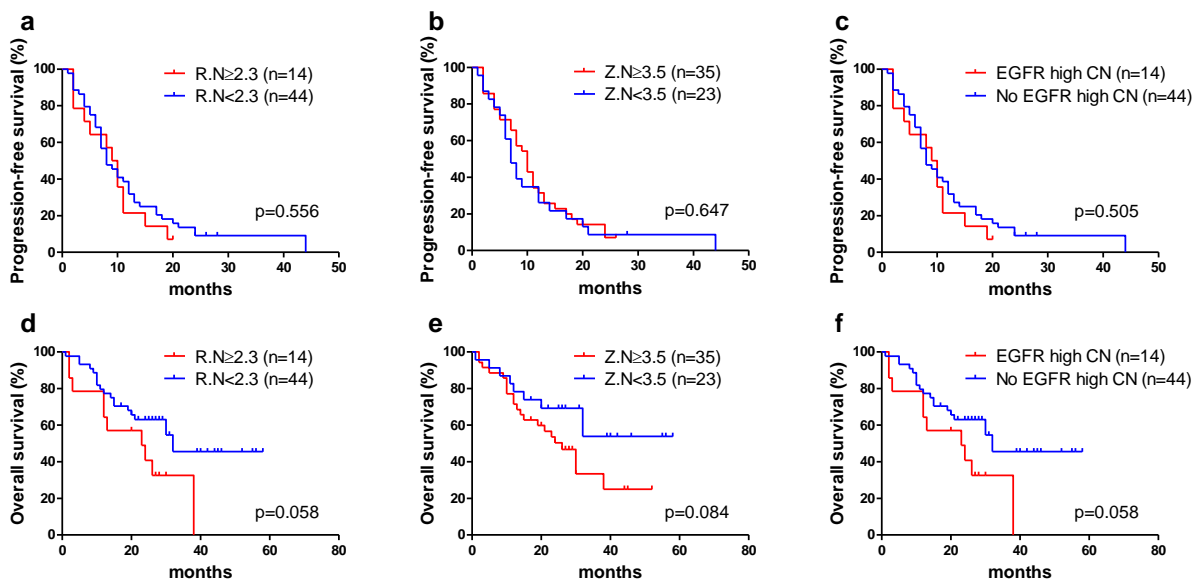

**Supplementary Figure S4.** Kaplan Meier plots of progression free and overall survival in 58 patients excluded two patients received osimertinib as first-line treatment using the normal

comparison approach. **a, b, c)** Progression-free survival time of EGFR mutated patients based on ratio  $\geq 2.3$ , z score  $\geq 3.5$  and the combined criteria. **d, e, f)** Overall survival of EGFR mutated patients based on EGFR ratio  $\geq 2.3$ , z score  $\geq 3.5$ , and the combined criteria.

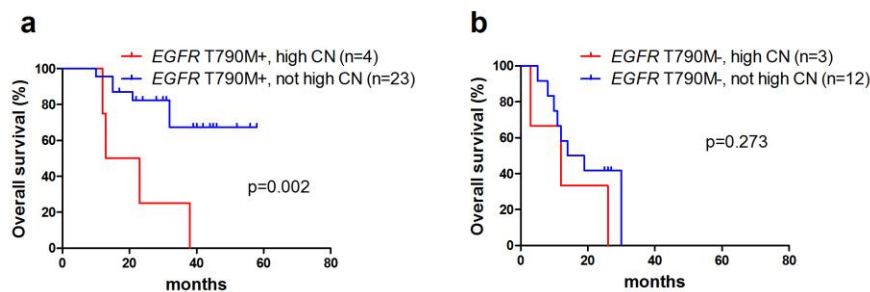

**Supplementary Figure S5.** Kaplan Meier analysis of copy number using the Internal comparison approach on OS for patients with or without an *EGFR* T790M at relapse. **a)** OS of 27 patients with T790M. T790M+ patients with *EGFR* high copy numbers had a shorter survival compared to those without high copy numbers. **b)** OS of 15 patients without T790M. All these T790M- patients had a short survival compared to *EGFR* T790M+, not *EGFR* high copy number patients.

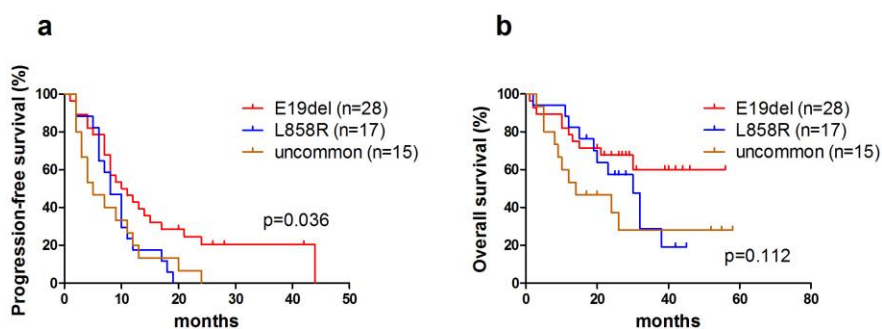

**Supplementary Figure S6.** Kaplan Meier plots of survival analysis among different *EGFR* activating mutation types in baseline biopsies. **a)** Patients with *EGFR* E19DEL in baseline biopsy had a longer PFS time compared with patients with L858R mutation or uncommon *EGFR* activating mutation. **b)** There was no difference for OS among patients with different mutation types. Uncommon: other *EGFR* TKI-sensitive mutations.

**Supplementary Table S1.** Overview of the hotspot regions included in the two designs used in the routine diagnostics.

| Amplicon ID | Panel Design | Library Pool | Gene          | Exon | Chr | Start       | Stop        | Coefficient of Variation | Reference Amplicon |
|-------------|--------------|--------------|---------------|------|-----|-------------|-------------|--------------------------|--------------------|
| NRAS_E2     | Design 1     | NA           | <i>NRAS</i>   | E2   | 1   | 115,252,142 | 115,252,336 | 0.47                     | YES                |
| NRAS_E3     | Design 1     | NA           | <i>NRAS</i>   | E3   | 1   | 115,256,404 | 115,256,624 | 0.51                     | NO                 |
| NRAS_E4     | Design 1     | NA           | <i>NRAS</i>   | E4   | 1   | 115,258,640 | 115,258,864 | 0.42                     | YES                |
| ALK_E23     | Design 1     | NA           | <i>ALK</i>    | E23  | 2   | 29,432,582  | 29,432,798  | 0.50                     | NO                 |
| ALK_E25     | Design 1     | NA           | <i>ALK</i>    | E25  | 2   | 29,443,544  | 29,443,753  | 0.44                     | YES                |
| PIK3CA_E10  | Design 1     | NA           | <i>PIK3CA</i> | E10  | 3   | 178,936,053 | 178,936,181 | 0.80                     | NO                 |
| PIK3CA_E21  | Design 1     | NA           | <i>PIK3CA</i> | E21  | 3   | 178,951,972 | 178,952,197 | 0.49                     | YES                |
| PDGFRA_E12  | Design 1     | NA           | <i>PDGFRA</i> | E12  | 4   | 55,140,935  | 55,141,138  | 0.75                     | NO                 |
| PDGFRA_E14  | Design 1     | NA           | <i>PDGFRA</i> | E14  | 4   | 55,144,042  | 55,144,265  | 0.35                     | YES                |
| PDGFRA_E18  | Design 1     | NA           | <i>PDGFRA</i> | E18  | 4   | 55,151,981  | 55,152,185  | 0.36                     | YES                |
| KIT_E8      | Design 1     | NA           | <i>KIT</i>    | E8   | 4   | 55,589,673  | 55,589,886  | 0.50                     | NO                 |
| KIT_E9      | Design 1     | NA           | <i>KIT</i>    | E9   | 4   | 55,592,034  | 55,592,251  | 0.47                     | YES                |
| KIT_E11     | Design 1     | NA           | <i>KIT</i>    | E11  | 4   | 55,593,531  | 55,593,755  | 0.53                     | NO                 |
| KIT_E13     | Design 1     | NA           | <i>KIT</i>    | E13  | 4   | 55,594,129  | 55,594,354  | 0.53                     | NO                 |
| KIT_E14     | Design 1     | NA           | <i>KIT</i>    | E14  | 4   | 55,595,452  | 55,595,680  | 0.56                     | NO                 |
| KIT_E17     | Design 1     | NA           | <i>KIT</i>    | E17  | 4   | 55,599,231  | 55,599,444  | 0.47                     | YES                |
| EGFR_E18    | Design 1     | NA           | <i>EGFR</i>   | E18  | 7   | 55,241,597  | 55,241,800  | 0.68                     | NO                 |
| EGFR_E19    | Design 1     | NA           | <i>EGFR</i>   | E19  | 7   | 55,242,353  | 55,242,556  | 0.62                     | NO                 |
| EGFR_E20    | Design 1     | NA           | <i>EGFR</i>   | E20  | 7   | 55,248,917  | 55,249,145  | 0.89                     | NO                 |
| EGFR_E21    | Design 1     | NA           | <i>EGFR</i>   | E21  | 7   | 55,259,368  | 55,259,594  | 0.67                     | NO                 |
| BRAF_E11    | Design 1     | NA           | <i>BRAF</i>   | E11  | 7   | 140,453,030 | 140,453,241 | 0.92                     | NO                 |
| BRAF_E15    | Design 1     | NA           | <i>BRAF</i>   | E15  | 7   | 140,481,298 | 140,481,518 | 0.84                     | NO                 |
| GNAQ_E5     | Design 1     | NA           | <i>GNAQ</i>   | E5   | 9   | 80,409,462  | 80,409,591  | 0.71                     | NO                 |
| KRAS_E2     | Design 1     | NA           | <i>KRAS</i>   | E2   | 12  | 25,378,432  | 25,378,651  | 0.79                     | NO                 |
| KRAS_E3     | Design 1     | NA           | <i>KRAS</i>   | E3   | 12  | 25,380,180  | 25,380,336  | 0.50                     | NO                 |
| KRAS_E4     | Design 1     | NA           | <i>KRAS</i>   | E4   | 12  | 25,398,184  | 25,398,387  | 0.55                     | NO                 |
| ERBB2_E23   | Design 1     | NA           | <i>ERBB2</i>  | E23  | 17  | 37,880,117  | 37,880,341  | 0.67                     | NO                 |
| ERBB2_E24   | Design 1     | NA           | <i>ERBB2</i>  | E24  | 17  | 37,880,910  | 37,881,090  | 0.66                     | NO                 |

| Amplicon ID  | Panel Design | Library Pool | Gene          | Exon  | Chr | Start       | Stop        | Coefficient of Variation | Reference Amplicon |
|--------------|--------------|--------------|---------------|-------|-----|-------------|-------------|--------------------------|--------------------|
| ERBB2_E25    | Design 1     | NA           | <i>ERBB2</i>  | E25   | 17  | 37,881,284  | 37,881,499  | 0.68                     | NO                 |
| GNA11_E5     | Design 1     | NA           | <i>GNA11</i>  | E5    | 19  | 3,118,790   | 3,119,018   | 0.77                     | NO                 |
| NRAS_E4      | Design 2     | 1            | <i>NRAS</i>   | E4    | 1   | 115,252,186 | 115,252,314 | 1.00                     | YES                |
| NRAS_E3      | Design 2     | 2            | <i>NRAS</i>   | E3    | 1   | 115,256,462 | 115,256,578 | 0.48                     | NO                 |
| NRAS_E2      | Design 2     | 1            | <i>NRAS</i>   | E2    | 1   | 115,258,686 | 115,258,805 | 0.28                     | YES                |
| H3F3A_E2     | Design 2     | 2            | <i>H3F3A</i>  | E2    | 1   | 226,252,098 | 226,252,197 | 0.67                     | NO                 |
| ALK_E25      | Design 2     | 1            | <i>ALK</i>    | E25   | 2   | 29,432,581  | 29,432,710  | 1.45                     | NO                 |
| ALK_E23.2    | Design 2     | 2            | <i>ALK</i>    | E23.2 | 2   | 29,443,568  | 29,443,695  | 0.34                     | YES                |
| ALK_E23.1    | Design 2     | 1            | <i>ALK</i>    | E23.1 | 2   | 29,443,686  | 29,443,766  | 0.57                     | NO                 |
| ALK_E22      | Design 2     | 2            | <i>ALK</i>    | E22   | 2   | 29,445,209  | 29,445,319  | 0.35                     | YES                |
| IDH1_E4      | Design 2     | 1            | <i>IDH1</i>   | E4    | 2   | 209,113,081 | 209,113,196 | 0.27                     | YES                |
| PIK3CA_E10.1 | Design 2     | 1            | <i>PIK3CA</i> | E10.1 | 3   | 178,936,052 | 178,936,169 | 0.63                     | NO                 |
| PIK3CA_E21.2 | Design 2     | 2            | <i>PIK3CA</i> | E21.2 | 3   | 178,952,018 | 178,952,135 | 0.61                     | NO                 |
| PDGFRA_E12.1 | Design 2     | 1            | <i>PDGFRA</i> | E12.1 | 4   | 55,140,936  | 55,141,058  | 0.33                     | YES                |
| PDGFRA_E12.2 | Design 2     | 2            | <i>PDGFRA</i> | E12.2 | 4   | 55,141,047  | 55,141,154  | 0.26                     | YES                |
| PDGFRA_E14.2 | Design 2     | 1            | <i>PDGFRA</i> | E14.2 | 4   | 55,144,027  | 55,144,127  | 0.40                     | NO                 |
| PDGFRA_E14.1 | Design 2     | 2            | <i>PDGFRA</i> | E14.1 | 4   | 55,144,116  | 55,144,191  | 0.55                     | NO                 |
| PDGFRA_E18.2 | Design 2     | 1            | <i>PDGFRA</i> | E18.2 | 4   | 55,151,969  | 55,152,087  | 0.31                     | YES                |
| PDGFRA_E18.1 | Design 2     | 2            | <i>PDGFRA</i> | E18.1 | 4   | 55,152,076  | 55,152,162  | 0.38                     | NO                 |
| KIT_E8.2     | Design 2     | 1            | <i>KIT</i>    | E8.2  | 4   | 55,589,635  | 55,589,765  | 0.42                     | NO                 |
| KIT_E8.1     | Design 2     | 2            | <i>KIT</i>    | E8.1  | 4   | 55,589,754  | 55,589,875  | 0.58                     | NO                 |
| KIT_E9.1     | Design 2     | 1            | <i>KIT</i>    | E9.1  | 4   | 55,592,014  | 55,592,139  | 0.34                     | NO                 |
| KIT_E9.2     | Design 2     | 2            | <i>KIT</i>    | E9.2  | 4   | 55,592,130  | 55,592,244  | 0.83                     | NO                 |
| KIT_E11.1    | Design 2     | 1            | <i>KIT</i>    | E11.1 | 4   | 55,593,518  | 55,593,634  | 0.50                     | NO                 |
| KIT_E11.2    | Design 2     | 2            | <i>KIT</i>    | E11.2 | 4   | 55,593,623  | 55,593,725  | 0.38                     | NO                 |
| KIT_E13.2    | Design 2     | 1            | <i>KIT</i>    | E13.2 | 4   | 55,594,096  | 55,594,221  | 0.34                     | NO                 |
| KIT_E13.1    | Design 2     | 2            | <i>KIT</i>    | E13.1 | 4   | 55,594,210  | 55,594,296  | 0.33                     | YES                |
| KIT_E14.2    | Design 2     | 1            | <i>KIT</i>    | E14.2 | 4   | 55,595,494  | 55,595,605  | 0.70                     | NO                 |
| KIT_E14.1    | Design 2     | 2            | <i>KIT</i>    | E14.1 | 4   | 55,595,594  | 55,595,661  | 0.62                     | NO                 |
| KIT_E17.1    | Design 2     | 1            | <i>KIT</i>    | E17.1 | 4   | 55,599,228  | 55,599,303  | 0.78                     | NO                 |
| KIT_E17.2    | Design 2     | 2            | <i>KIT</i>    | E17.2 | 4   | 55,599,292  | 55,599,376  | 0.33                     | YES                |

| Amplicon ID | Panel Design | Library Pool | Gene        | Exon  | Chr | Start       | Stop        | Coefficient of Variation | Reference Amplicon |
|-------------|--------------|--------------|-------------|-------|-----|-------------|-------------|--------------------------|--------------------|
| KIT_E18.1   | Design 2     | 1            | <i>KIT</i>  | E18.1 | 4   | 55,602,574  | 55,602,691  | 0.44                     | NO                 |
| KIT_E18.2   | Design 2     | 2            | <i>KIT</i>  | E18.2 | 4   | 55,602,680  | 55,602,790  | 0.39                     | NO                 |
| ROS1_E41    | Design 2     | 1            | <i>ROS1</i> | E41   | 6   | 117,630,009 | 117,630,131 | 0.52                     | NO                 |
| ROS1_E38    | Design 2     | 2            | <i>ROS1</i> | E38   | 6   | 117,638,290 | 117,638,405 | 0.42                     | NO                 |
| ESR1_E9.1   | Design 2     | 1            | <i>ESR1</i> | E9.1  | 6   | 152,415,476 | 152,415,600 | 0.41                     | NO                 |
| ESR1_E9.2   | Design 2     | 2            | <i>ESR1</i> | E9.2  | 6   | 152,415,600 | 152,415,719 | 0.40                     | NO                 |
| ESR1_E10.1  | Design 2     | 1            | <i>ESR1</i> | E10.1 | 6   | 152,419,789 | 152,419,918 | 0.31                     | YES                |
| ESR1_E10.2  | Design 2     | 2            | <i>ESR1</i> | E10.2 | 6   | 152,419,907 | 152,420,028 | 0.55                     | NO                 |
| EGFR_E12    | Design 2     | 1            | <i>EGFR</i> | E12   | 7   | 55,227,949  | 55,228,060  | 0.91                     | NO                 |
| EGFR_E18.2  | Design 2     | 2            | <i>EGFR</i> | E18.2 | 7   | 55,241,600  | 55,241,688  | 0.73                     | NO                 |
| EGFR_E18.1  | Design 2     | 1            | <i>EGFR</i> | E18.1 | 7   | 55,241,677  | 55,241,801  | 0.85                     | NO                 |
| EGFR_E19.1  | Design 2     | 2            | <i>EGFR</i> | E19.1 | 7   | 55,242,350  | 55,242,454  | 0.66                     | NO                 |
| EGFR_E19.2  | Design 2     | 1            | <i>EGFR</i> | E19.2 | 7   | 55,242,443  | 55,242,563  | 0.69                     | NO                 |
| EGFR_E20.1  | Design 2     | 2            | <i>EGFR</i> | E20.1 | 7   | 55,248,956  | 55,249,064  | 0.83                     | NO                 |
| EGFR_E20.2  | Design 2     | 1            | <i>EGFR</i> | E20.2 | 7   | 55,249,004  | 55,249,131  | 1.39                     | NO                 |
| EGFR_E20.3  | Design 2     | 2            | <i>EGFR</i> | E20.3 | 7   | 55,249,120  | 55,249,200  | 1.25                     | NO                 |
| EGFR_E21.2  | Design 2     | 1            | <i>EGFR</i> | E21.2 | 7   | 55,259,364  | 55,259,492  | 0.68                     | NO                 |
| EGFR_E21.1  | Design 2     | 2            | <i>EGFR</i> | E21.1 | 7   | 55,259,481  | 55,259,578  | 0.64                     | NO                 |
| MET_E14.1   | Design 2     | 1            | <i>MET</i>  | E14.1 | 7   | 116,411,819 | 116,411,941 | 0.37                     | NO                 |
| MET_E14.2   | Design 2     | 2            | <i>MET</i>  | E14.2 | 7   | 116,411,949 | 116,412,070 | 0.51                     | NO                 |
| BRAF_E15    | Design 2     | 1            | <i>BRAF</i> | E15   | 7   | 140,453,097 | 140,453,215 | 0.44                     | NO                 |
| BRAF_E11.2  | Design 2     | 2            | <i>BRAF</i> | E11.2 | 7   | 140,481,361 | 140,481,448 | 0.35                     | YES                |
| BRAF_E11.1  | Design 2     | 1            | <i>BRAF</i> | E11.1 | 7   | 140,481,391 | 140,481,511 | 0.38                     | NO                 |
| JAK2_E13    | Design 2     | 1            | <i>JAK2</i> | E13   | 9   | 5,073,679   | 5,073,801   | 0.76                     | NO                 |
| GNAQ_E5     | Design 2     | 2            | <i>GNAQ</i> | E5    | 9   | 80,409,381  | 80,409,502  | 0.47                     | NO                 |
| GNAQ_E4     | Design 2     | 1            | <i>GNAQ</i> | E4    | 9   | 80,412,424  | 80,412,546  | 0.30                     | YES                |
| HRAS_E4     | Design 2     | 1            | <i>HRAS</i> | E4    | 11  | 533,482     | 533,581     | 0.56                     | NO                 |
| HRAS_E3     | Design 2     | 2            | <i>HRAS</i> | E3    | 11  | 533,781     | 533,882     | 0.34                     | YES                |
| HRAS_E2     | Design 2     | 1            | <i>HRAS</i> | E2    | 11  | 534,219     | 534,306     | 0.81                     | NO                 |
| KRAS_E4.1   | Design 2     | 1            | <i>KRAS</i> | E4.1  | 12  | 25,378,526  | 25,378,605  | 0.72                     | NO                 |
| KRAS_E4.2   | Design 2     | 2            | <i>KRAS</i> | E4.2  | 12  | 25,378,587  | 25,378,663  | 0.43                     | NO                 |



| Amplicon ID | Panel Design | Library Pool | Gene          | Exon  | Chr | Start       | Stop        | Coefficient of Variation | Reference Amplicon |
|-------------|--------------|--------------|---------------|-------|-----|-------------|-------------|--------------------------|--------------------|
| KRAS_E3.2   | Design 2     | 1            | <i>KRAS</i>   | E3.2  | 12  | 25,380,169  | 25,380,270  | 4.48                     | NO                 |
| KRAS_E3.1   | Design 2     | 2            | <i>KRAS</i>   | E3.1  | 12  | 25,380,259  | 25,380,337  | 1.08                     | NO                 |
| KRAS_E2     | Design 2     | 1            | <i>KRAS</i>   | E2    | 12  | 25,398,188  | 25,398,310  | 0.55                     | NO                 |
| POLE_E13    | Design 2     | 2            | <i>POLE</i>   | E13   | 12  | 133,250,220 | 133,250,310 | 0.28                     | YES                |
| POLE_E9     | Design 2     | 1            | <i>POLE</i>   | E9    | 12  | 133,253,118 | 133,253,245 | 0.35                     | NO                 |
| AKT1_E3     | Design 2     | 2            | <i>AKT1</i>   | E3    | 14  | 105,246,472 | 105,246,583 | 0.34                     | YES                |
| MAP2K1_E2   | Design 2     | 1            | <i>MAP2K1</i> | E2    | 15  | 66,727,413  | 66,727,523  | 0.31                     | YES                |
| MAP2K1_E3   | Design 2     | 2            | <i>MAP2K1</i> | E3    | 15  | 66,729,091  | 66,729,218  | 0.42                     | NO                 |
| MAP2K1_E6   | Design 2     | 1            | <i>MAP2K1</i> | E6    | 15  | 66,774,070  | 66,774,199  | 0.27                     | YES                |
| MAP2K1_E7.1 | Design 2     | 2            | <i>MAP2K1</i> | E7.1  | 15  | 66,777,302  | 66,777,413  | 0.27                     | YES                |
| MAP2K1_E7.2 | Design 2     | 1            | <i>MAP2K1</i> | E7.2  | 15  | 66,777,402  | 66,777,522  | 0.42                     | NO                 |
| MAP2K1_E11  | Design 2     | 2            | <i>MAP2K1</i> | E11   | 15  | 66,782,826  | 66,782,955  | 0.45                     | NO                 |
| IDH2_E4     | Design 2     | 1            | <i>IDH2</i>   | E4    | 15  | 90,631,757  | 90,631,886  | 0.53                     | NO                 |
| ERBB2_E23.2 | Design 2     | 2            | <i>ERBB2</i>  | E23.2 | 17  | 37,880,146  | 37,880,238  | 0.69                     | NO                 |
| ERBB2_E23.1 | Design 2     | 1            | <i>ERBB2</i>  | E23.1 | 17  | 37,880,227  | 37,880,352  | 1.48                     | NO                 |
| ERBB2_E24   | Design 2     | 2            | <i>ERBB2</i>  | E24   | 17  | 37,880,960  | 37,881,060  | 0.62                     | NO                 |
| ERBB2_E25   | Design 2     | 1            | <i>ERBB2</i>  | E25   | 17  | 37,881,324  | 37,881,453  | 0.72                     | YES                |
| H3F3B_E3    | Design 2     | 2            | <i>H3F3B</i>  | E3    | 17  | 73,775,027  | 73,775,156  | 0.51                     | NO                 |
| H3F3B_E2    | Design 2     | 1            | <i>H3F3B</i>  | E2    | 17  | 73,775,144  | 73,775,227  | 0.91                     | NO                 |
| GNA11_E4    | Design 2     | 2            | <i>GNA11</i>  | E4    | 19  | 3,114,959   | 3,115,051   | 0.61                     | NO                 |
| GNA11_E5    | Design 2     | 1            | <i>GNA11</i>  | E5    | 19  | 3,118,875   | 3,118,993   | 0.52                     | NO                 |
| GNAS_E8     | Design 2     | 2            | <i>GNAS</i>   | E8    | 20  | 57,484,359  | 57,484,474  | 0.58                     | NO                 |
| GNAS_E9     | Design 2     | 1            | <i>GNAS</i>   | E9    | 20  | 57,484,534  | 57,484,659  | 0.30                     | YES                |
| AMELY_E3*   | Design 2     | 2            | <i>AMELY</i>  | E3    | Y   | 6,738,019   | 6,738,142   | Na                       | NO                 |

\* AMELY is a housekeeping gene that is in chromosome Y, thus not applicable for coefficient of variation calculation

**Supplementary Table S2.** Type of *EGFR* mutations reported in the diagnostic setting in NSCLC patients (2014-2017).

| <i>EGFR</i> mutation      | No. Samples / Patients | Frequency in cohort |
|---------------------------|------------------------|---------------------|
| E19 DEL                   | 85 / 66                | 4.2%                |
| L858R                     | 71 / 51                | 3.3%                |
| G719A/C/S                 | 28 / 17                | 1.1%                |
| E20 INDEL <sup>b</sup>    | 23 / 17                | 1.1%                |
| S768I                     | 9 / 6                  | 0.4%                |
| C797S <sup>b</sup>        | 4 / 2                  | 0.1%                |
| E709A/K                   | 6 / 3                  | 0.2%                |
| L861Q                     | 6 / 4                  | 0.3%                |
| A840T <sup>b</sup>        | 3 / 3                  | 0.2%                |
| V689L                     | 2 / 2                  | 0.1%                |
| L747P <sup>b</sup>        | 2 / 2                  | 0.1%                |
| D761N                     | 2 / 1                  | 0.1%                |
| R776G <sup>a</sup>        | 2 / 1                  | 0.1%                |
| T488N <sup>a</sup>        | 1 / 1                  | 0.1%                |
| K714N <sup>a</sup>        | 1 / 1                  | 0.1%                |
| T751_S752del <sup>a</sup> | 1 / 1                  | 0.1%                |
| A755V <sup>a</sup>        | 1 / 1                  | 0.1%                |
| Y764Y <sup>a</sup>        | 1 / 1                  | 0.1%                |
| V769* <sup>b</sup>        | 1 / 1                  | 0.1%                |
| C775V <sup>a</sup>        | 1 / 1                  | 0.1%                |
| R776H                     | 1 / 1                  | 0.1%                |
| R776L                     | 1 / 1                  | 0.1%                |
| T790S <sup>a</sup>        | 1 / 1                  | 0.1%                |
| L792H                     | 1 / 1                  | 0.1%                |
| G810V <sup>a</sup>        | 1 / 1                  | 0.1%                |
| D830Y                     | 1 / 1                  | 0.1%                |
| V834L                     | 1 / 1                  | 0.1%                |
| R836L <sup>a</sup>        | 1 / 1                  | 0.1%                |
| P848L <sup>b</sup>        | 1 / 1                  | 0.1%                |
| L861R                     | 1 / 1                  | 0.1%                |
| H870R <sup>a</sup>        | 1 / 1                  | 0.1%                |

<sup>a</sup> Response of this variant to EGFR-TKI is unknown

<sup>b</sup> Variants reported to be unresponsive or resistant to EGFR-TKI

Supplementary Table S3: Univariate analysis for progression-free survival

| Variables                                 | n                           | Univariate analysis |                         |           |       |
|-------------------------------------------|-----------------------------|---------------------|-------------------------|-----------|-------|
|                                           |                             | HR                  | 95% confidence interval | p         |       |
| Age                                       | <60                         | 17                  |                         |           |       |
|                                           | ≥60                         | 43                  | 1.02                    | 0.56-1.86 | 0.939 |
| Gender                                    | Female                      | 40                  |                         |           |       |
|                                           | Male                        | 20                  | 1.31                    | 0.74-2.31 | 0.353 |
| Smoking                                   | Non-smoker                  | 24                  |                         |           |       |
|                                           | Smoker (former and current) | 36                  | 1.09                    | 0.63-1.88 | 0.764 |
| VAF                                       | <50%                        | 28                  |                         |           |       |
|                                           | ≥50%                        | 32                  | 1.29                    | 0.75-2.23 | 0.354 |
| Activating mutation                       | E19DEL                      | 28                  |                         |           |       |
|                                           | L858R                       | 17                  | 1.89                    | 0.98-3.62 | 0.058 |
|                                           | Uncommon                    | 15                  | 2.1                     | 1.08-4.08 | 0.028 |
| First-line EGFR-TKI                       | Afatinib                    | 14                  |                         |           |       |
|                                           | Gefitinib                   | 28                  | 1.05                    | 0.54-2.07 | 0.884 |
|                                           | Erlotinib                   | 16                  | 1.19                    | 0.57-2.52 | 0.641 |
|                                           | Osimertinib <sup>#</sup>    | 2                   | -                       | -         | -     |
| High copy number<br>(internal comparison) | Low                         | 49                  |                         |           |       |
|                                           | High                        | 11                  | 1.51                    | 0.77-2.96 | 0.235 |
| High copy number<br>(normal comparison)   | Low                         | 46                  |                         |           |       |
|                                           | High                        | 14                  | 1.26                    | 0.67-2.37 | 0.479 |

<sup>#</sup> Limited two patients that did not include for univariate analysis

Supplementary Table S4: Univariate and multivariate analysis for overall survival information

| Variables                                   | n                           | Univariate analysis |                         |           | multivariate analysis |                         |           | multivariate analysis* |                         |           |       |
|---------------------------------------------|-----------------------------|---------------------|-------------------------|-----------|-----------------------|-------------------------|-----------|------------------------|-------------------------|-----------|-------|
|                                             |                             | HR                  | 95% confidence interval | p         | HR                    | 95% confidence interval | p         | HR                     | 95% confidence interval | p         |       |
| Age                                         | <60                         | 17                  |                         |           |                       |                         |           |                        |                         |           |       |
|                                             | ≥60                         | 43                  | 1.44                    | 0.62-3.35 | 0.396                 |                         |           |                        |                         |           |       |
| Gender                                      | Female                      | 40                  |                         |           |                       |                         |           |                        |                         |           |       |
|                                             | Male                        | 20                  | 1.54                    | 0.75-3.15 | 0.237                 |                         |           |                        |                         |           |       |
| Smoking                                     | Non-smoker                  | 24                  |                         |           |                       |                         |           |                        |                         |           |       |
|                                             | Smoker (former and current) | 36                  | 1.17                    | 0.56-2.44 | 0.682                 |                         |           |                        |                         |           |       |
| VAF                                         | <50%                        | 28                  |                         |           |                       |                         |           |                        |                         |           |       |
|                                             | ≥50%                        | 32                  | 1.61                    | 0.78-3.33 | 0.195                 |                         |           |                        |                         |           |       |
| Activating mutation                         | E19DEL                      | 28                  |                         |           |                       |                         |           |                        |                         |           |       |
|                                             | L858R                       | 17                  | 1.74                    | 0.74-4.11 | 0.204                 | 1.52                    | 0.64-3.61 | 0.349                  | 1.81                    | 0.77-4.27 | 0.349 |
| First-line EGFR-TKI                         | Uncommon                    | 15                  | 2.46                    | 1.02-5.93 | 0.046                 | 1.89                    | 0.774-6.8 | 0.17                   | 2.4                     | 0.99-5.78 | 0.052 |
|                                             | Afatinib                    | 14                  |                         |           |                       |                         |           |                        |                         |           |       |
|                                             | Gefitinib                   | 28                  | 0.55                    | 0.22-1.36 | 0.195                 |                         |           |                        |                         |           |       |
|                                             | Erlotinib                   | 16                  | 0.81                    | 0.30-2.13 | 0.663                 |                         |           |                        |                         |           |       |
|                                             | Osimertinib <sup>#</sup>    | 2                   | -                       | -         | -                     |                         |           |                        |                         |           |       |
| EGFR High copy number (internal comparison) | Low                         | 49                  |                         |           |                       |                         |           |                        |                         |           |       |
|                                             | High                        | 11                  | 3.62                    | 1.71-7.64 | 0.001                 |                         |           |                        |                         |           |       |
|                                             |                             |                     |                         |           |                       | 3.14                    | 1.46-6.78 | 0.003                  |                         |           |       |
| EGFR High copy number (normal comparison)   | Low                         | 46                  |                         |           |                       |                         |           |                        |                         |           |       |
|                                             | High                        | 14                  | 2.02                    | 0.94-4.33 | 0.07                  |                         |           |                        | 2.01                    | 0.94-4.32 | 0.074 |

\* Because EGFR high copy number determined by internal and normal comparison approaches are not independent covariates, we did multivariate analysis for 2 separate times. <sup>#</sup>Limited two patients that did not include for univariate analysis

**Supplementary Table S5. Second-line treatment of the 60 NSCLC patients**

| Second-line treatment                                    | n=60 |
|----------------------------------------------------------|------|
| 1 <sup>st</sup> and 2 <sup>nd</sup> generation EGFR-TKIs | 12   |
| afatinib                                                 | 4    |
| gefitinib                                                | 4    |
| gefitinib/crizotinib                                     | 1    |
| erlotinib                                                | 3    |
| 3 <sup>rd</sup> generation EGFR-TKIs                     | 26   |
| osimertinib*                                             | 25   |
| rociletinib                                              | 1    |
| Chemotherapy                                             | 7    |
| Pemetrexed/Carboplatin                                   | 6    |
| pemetrexed/cisplatin                                     | 1    |
| trastuzumab/pertuzumab                                   | 1    |
| Stereotactic body radiation therapy                      | 1    |
| no further treatment                                     | 12   |
| unknown                                                  | 1    |

\*Two patients received third-line and one patient received fourth-line osimertinib treatment.

Supplementary Table S6: Univariate and multivariate analysis for overall survival regarding second-line or subsequent lines treatment

| Variables                                                                          | Univariate analysis |                         |      | multivariate analysis |                         |      | multivariate analysis* |                         |      |           |       |
|------------------------------------------------------------------------------------|---------------------|-------------------------|------|-----------------------|-------------------------|------|------------------------|-------------------------|------|-----------|-------|
|                                                                                    | HR                  | 95% confidence interval | p    | HR                    | 95% confidence interval | p    | HR                     | 95% confidence interval | p    |           |       |
| <i>EGFR</i> High copy number (internal comparison)                                 | Low                 | 49                      |      |                       |                         |      |                        |                         |      |           |       |
|                                                                                    | High                | 11                      | 3.62 | 1.71-7.64             | 0.001                   | 3.8  | 1.78-8.1               | 0.001                   | 2.79 | 1.29-6.02 | 0.009 |
| presence of T790M at progressive disease                                           | no                  | 15                      |      |                       |                         |      |                        |                         |      |           |       |
|                                                                                    | yes                 | 27                      | 0.24 | 0.1-0.58              | 0.002                   | 0.24 | 0.1-0.59               | 0.002                   |      |           |       |
|                                                                                    | missing             | 18                      | 0.59 | 0.25-1.41             | 0.233                   | 0.67 | 0.28-1.62              | 0.38                    |      |           |       |
| 3 <sup>rd</sup> generation <i>EGFR</i> -TKI as second-line or more lines treatment | No                  | 26                      |      |                       |                         |      |                        |                         |      |           |       |
|                                                                                    | Yes                 | 29                      | 0.38 | 0.18-0.81             | 0.012                   |      |                        |                         | 0.43 | 0.20-0.91 | 0.028 |
|                                                                                    | Others <sup>#</sup> | 5                       |      |                       |                         |      |                        |                         |      |           |       |

\* Because presence of T790M mutation after resistance to first-line *EGFR*-TKI and osimertinib treatment are not independent covariates, we did multivariate analysis for 2 separate times. <sup>#</sup> Others include one patient for whom no second-line treatment information could be retrieved, the two patients received radiotherapy or *EGFR* antibody treatment as second-line treatment, and the two patients that had osimertinib in the first-line treatment.
